# Supplementary material for: Rh-catalyzed P–P bond activation
Source: Royal Society of Chemistry journal article supplement (doi:10.1039/b712972f), 2007-11-12
Supplement: b712972f.pdf [file b712972f.pdf]

## Rh-Catalyzed P-P Bond Activation

Stephen J. Geier and Douglas W. Stephan\*

### Supplementary Data

#### Experimental Section

All preparations were done under an atmosphere of dry, O<sub>2</sub>-free N<sub>2</sub> employing both Schlenk line techniques and an Innovative Technologies or Vacuum Atmospheres inert atmosphere glove box. Solvents were purified employing a Grubbs' type column systems manufactured by Innovative Technology. <sup>1</sup>H, <sup>13</sup>C and <sup>31</sup>P NMR spectroscopy spectra were recorded on a Bruker Avance-300 spectrometer. <sup>1</sup>H and <sup>13</sup>C NMR spectra are referenced to SiMe<sub>4</sub> using the residual solvent peak impurity of the given solvent. <sup>31</sup>P NMR spectra were referenced to 85% H<sub>3</sub>PO<sub>4</sub>. Chemical shifts are reported in ppm and coupling constants in Hz. C<sub>6</sub>D<sub>6</sub> and tol-d<sub>8</sub> were dried according to established procedures and used as the NMR solvents. Combustion analyses were performed in house employing a Perkin Elmer CHN Analyzer. RhNacNac(COE)N<sub>2</sub> was prepared according to the literature methods (Stephan, Can. J. Chem., 2005, 83, 324). Tetraphenyl biphosphine was purchased from the Aldrich Chemical Co., while other P<sub>2</sub> species were synthesized by reaction of the phosphine chloride with the corresponding lithium phosphide.

**Typical procedure for Hydrogenation of P<sub>2</sub>Ph<sub>4</sub>** A J. Young's tube was charged with 20 mg P<sub>2</sub>Ph<sub>4</sub> (0.056 mmol) and 3.5 mg **1** (0.0056 mmol, 10 mol%) in 0.75 mL tol-d<sub>8</sub>. The tube was subjected to three freeze-pump-thaw cycles and subsequently exposed to 1 atm of H<sub>2</sub> at 78 K (~4 atm). The tube was subsequently heated to 50°C. After 12 hours the <sup>31</sup>P NMR spectrum showed that hydrogenation of P<sub>2</sub>Ph<sub>4</sub> to two equivalents of Ph<sub>2</sub>PH had proceeded to 95% completion. Deuteration of Ph<sub>2</sub>PH was accomplished in a similar manner, using 20 mg Ph<sub>2</sub>PH (0.110 mmol) instead of P<sub>2</sub>Ph<sub>4</sub> and 4 atm D<sub>2</sub> instead of H<sub>2</sub>.

**General procedure For Silylation:** An NMR tube was charged with 20 mg Ph<sub>2</sub>PH (0.110 mmol), 100 mg silane (~5 equivalents) and 3.5 mg **1** (0.0056 mmol, 5 mol% relative to Ph<sub>2</sub>PH) and 0.75 mL tol-d<sub>8</sub>. The reaction was heated and monitored by <sup>31</sup>P NMR until no further reaction occurred. Reactions of biphosphines with silanes were performed in a similar fashion.

#### NMR data for silyl phosphines.

**Et<sub>3</sub>SiPPh<sub>2</sub>:** Spectroscopy identical that reported in: M. Hayashi, Y. Matsuura, Y. Watanabe, Tetrahedron Letters, 2004, 45, 1409-1411.

**Ph<sub>3</sub>SiPPh<sub>2</sub>:** Spectroscopy identical that reported in: A. Antoniadis, U. Kunze. Naturforsch, 1979, 34B, 116-117.

**Ph<sub>2</sub>(H)SiPPh<sub>2</sub>:** Spectroscopy identical that reported in: R. Shu, L. Hao, J.F. Harrod, H.-G. Woo and E. Samuel. J. Am. Chem.Soc., 1998, 120, 12988-12989.

**Ph<sub>2</sub>MeSiPPh<sub>2</sub>:** <sup>1</sup>H NMR (300 MHz, C<sub>6</sub>D<sub>6</sub>)δ: 0.62 (3H, d, J<sub>H-P</sub>=3.3 Hz), 6.93-7.16, 7.32-7.53 (m, 20 H), <sup>31</sup>P NMR (121 MHz, C<sub>6</sub>D<sub>6</sub>) δ: -59.2 (s), <sup>29</sup>S NMR (59 MHz, C<sub>6</sub>D<sub>6</sub>) δ: -8.2 (d, J<sub>Si-P</sub>=25 Hz).

**PhMe<sub>2</sub>SiPPh<sub>2</sub>:** <sup>1</sup>H NMR (300 MHz, C<sub>6</sub>D<sub>6</sub>)δ: 0.35 (6H, J=3.6 Hz), 6.95-7.17, 7.33-7.56 (m, 15 H), <sup>31</sup>P NMR (121 MHz, C<sub>6</sub>D<sub>6</sub>) δ: -58.2 (s), <sup>29</sup>S NMR (59 MHz, C<sub>6</sub>D<sub>6</sub>) δ: -3.8 (d, J<sub>Si-P</sub>=23 Hz).
